# Supplementary material
Source: publisher figshare collection journal article supplement (https://acs.figshare.com/ndownloader/files/15366935)
Supplement: Supplementary file 1 [file 15366935]

# Cs<sub>2</sub>SnI<sub>6</sub> Encapsulated Multi-Dye Sensitized All Solid-State Solar Cells

*Byunghong Lee,<sup>1\*</sup> Yamuna Ezhumalai,<sup>2</sup> Woongkyu Lee,<sup>1</sup> Ming-Chou Chen,<sup>2</sup> Chen-Yu*

*Yeh,<sup>3</sup> Tobin J. Marks,<sup>1,4</sup> and Robert P. H. Chang <sup>1\*</sup>*

<sup>1</sup>Department of Materials Science and Engineering and the Materials Research Center,  
the Argonne-Northwestern Solar Energy Research Center, Northwestern University,  
2145 Sheridan Road, Evanston, Illinois 60208, United States

<sup>2</sup>Research Center of New Generation Light Driven Photovoltaic Modules, National  
Central University, Taoyuan, 32001 Taiwan

<sup>3</sup>Department of Chemistry, Research Center for Sustainable Energy and  
Nanotechnology (RCSEN), and Innovation and Development Center of Sustainable  
Agriculture (IDCSA), National Chung Hsing University, Taichung, Taiwan

<sup>4</sup>Department of Chemistry, Northwestern University, 2145 Sheridan Road, Evanston,  
Illinois 60208, United States

## Corresponding Author

\* Byunghong Lee, E-mail address: redboho@gmail.com

\* Robert P.H Chang, E-mail address: r-chang@northwestern.edu

## S-1. Characteristics of Sn doped $\text{TiO}_2$

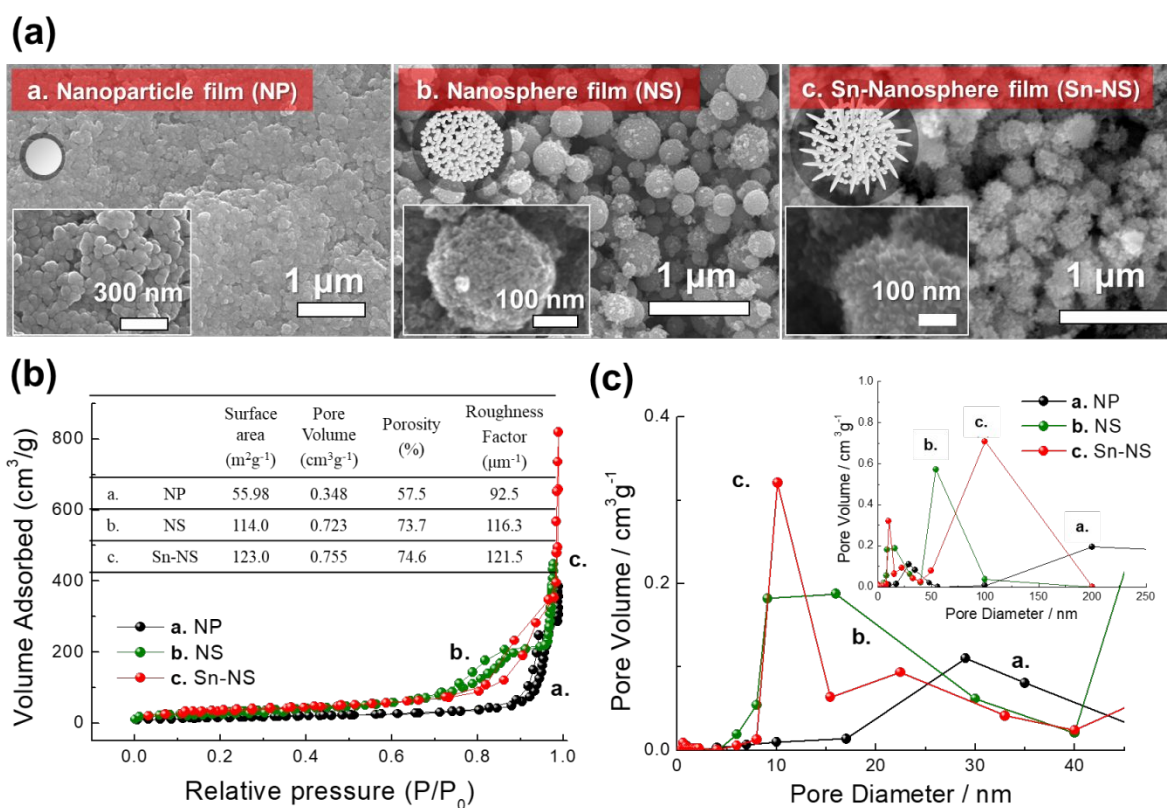

**Figure S1.** Morphology and physical properties of the different typed  $\text{TiO}_2$  film (a. nanoparticle (NP) b. nanosphere (NS), c. Sn doped nanosphere (Sn-NS) film): (a) SEM image with corresponding images of  $\text{TiO}_2$  shape, (b)  $\text{N}_2$  adsorption-desorption isotherms (inserted in the table of Specific surface area, pore volume, porosity, and roughness factor) and (c) the corresponding pore size distributions calculated by the BJH method from the adsorption branch

## S-2. EIS impedance model

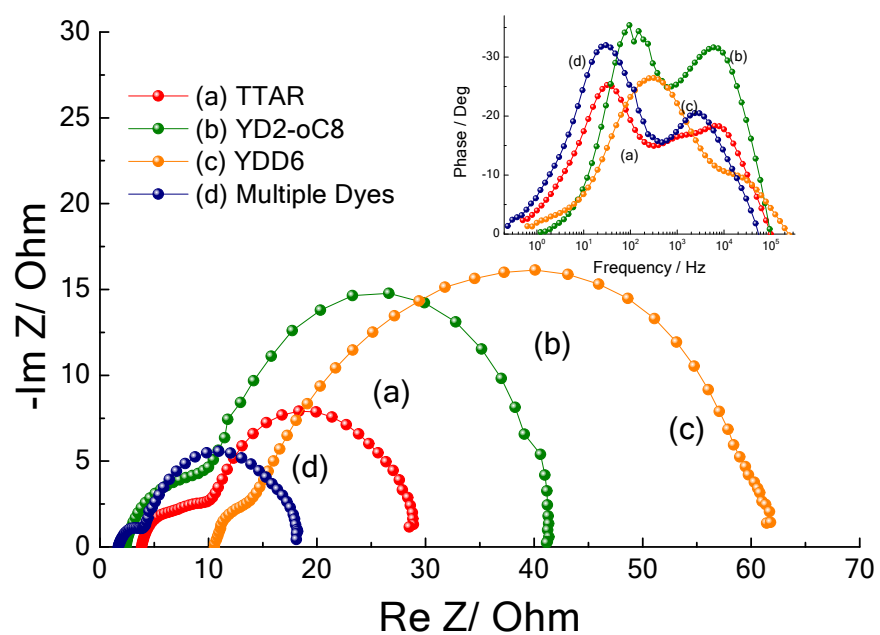

**Figure S2.** EIS analysis and Bode phase plots (inserted) with the best-fit model for the individual-dye for Sn-TiO<sub>2</sub>/ the individual-dye (a) TTAR (b) YD2-oC8 (c) YDD6 dye and (d) multi(TTAR/ YD2-oC8/Cs<sub>2</sub>SnI<sub>6</sub>)-sensitized DSSCs at liquid electrolyte

### S-3. Characteristics of $\text{Cs}_2\text{SnI}_6$ deposition

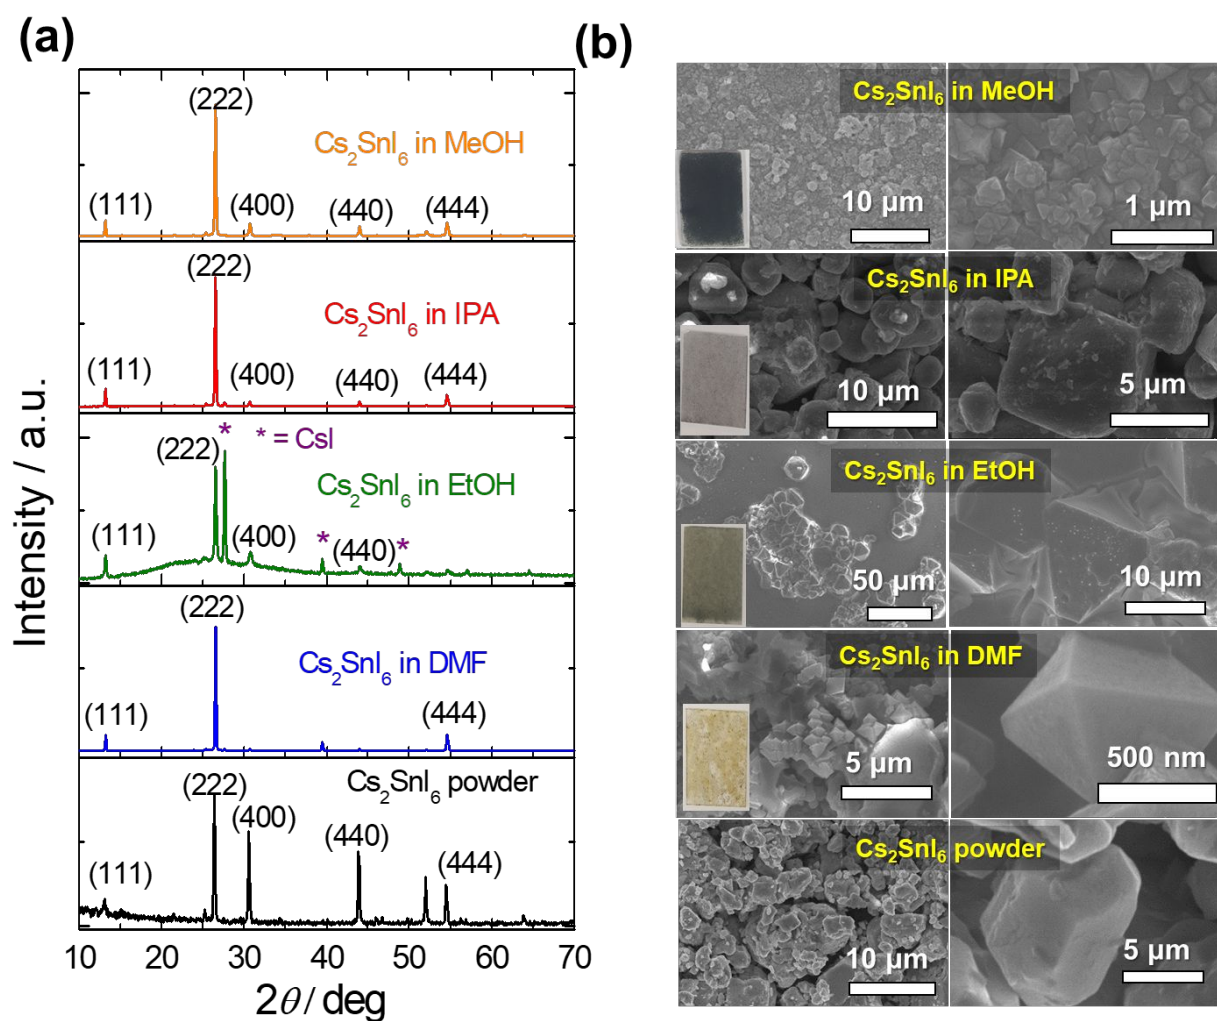

**Figure S3.** (a) XRD and (b) SEM images of E-sprayed  $\text{Cs}_2\text{SnI}_6$  films on FTO glass after dissolving  $\text{Cs}_2\text{SnI}_6$  in different solvents (inserted in the real film image)
